# Supplementary material for: Fluorescent hexaaryl- and hexa-heteroaryl[3]radialenes: Synthesis, structures, and properties
Source: publisher site journal article supplement (doi:10.3762/bjoc.8.7), 2012-01-11
Supplement: Additional file 1 [file 1860-5397-8-7-S1.pdf]

# Supporting Information File 1

for

## Fluorescent hexaaryl- and hexa-heteroaryl[3]radialenes: Synthesis, structures, and properties

Antonio Avellaneda, Courtney A. Hollis, Xin He and Christopher J. Sumbly\*

Address: School of Chemistry & Physics, The University of Adelaide, Adelaide, SA 5005, Australia. Phone: +61 8 8303 7406. Fax: +61 8 8303 4358

Email: Christopher J. Sumbly - christopher.sumbly@adelaide.edu.au

\* Corresponding author

### Table of contents

|                                                                      |                |
|----------------------------------------------------------------------|----------------|
| <b><sup>1</sup>H and <sup>13</sup>C NMR spectra of all compounds</b> | <b>S2–S10</b>  |
| <b>Cyclic voltammograms of hexaaryl[3]radialenes</b>                 | <b>S11–S12</b> |
| <b>Crystal data and structure refinement for 3</b>                   | <b>S13</b>     |

# $^1\text{H}$ and $^{13}\text{C}$ NMR spectra of all compounds

Solvent peaks are marked with an asterisk.

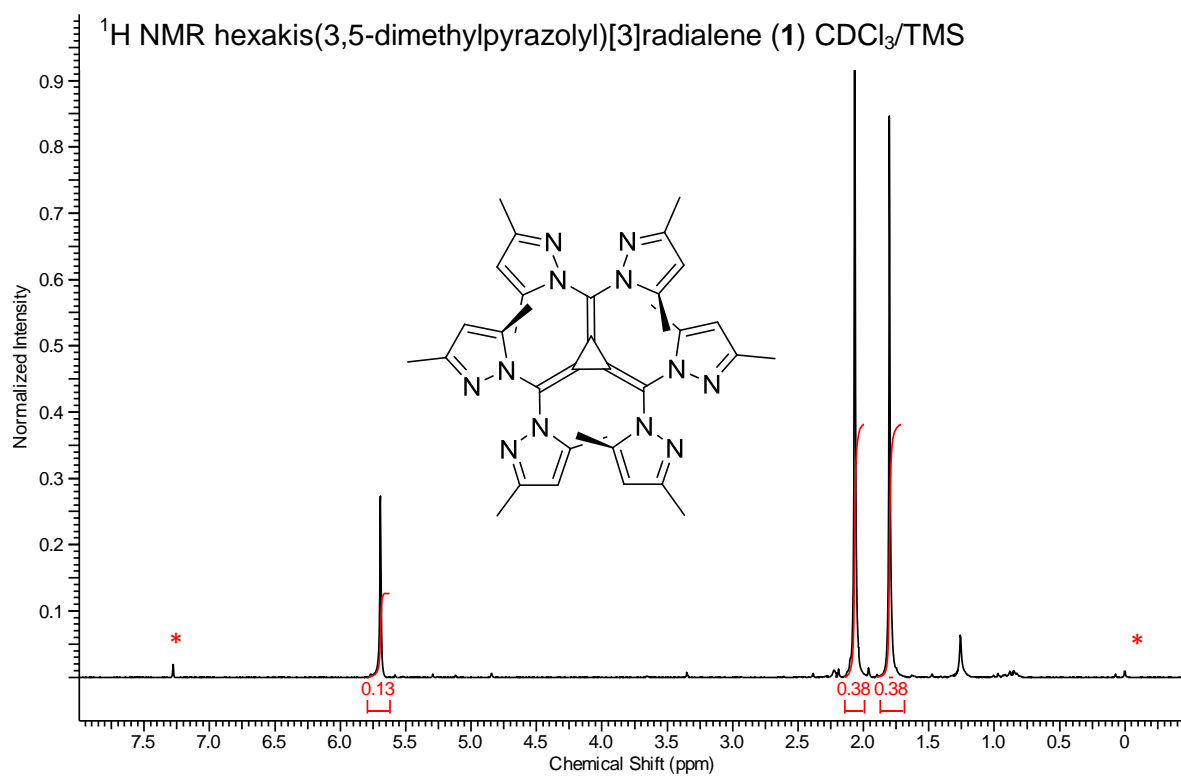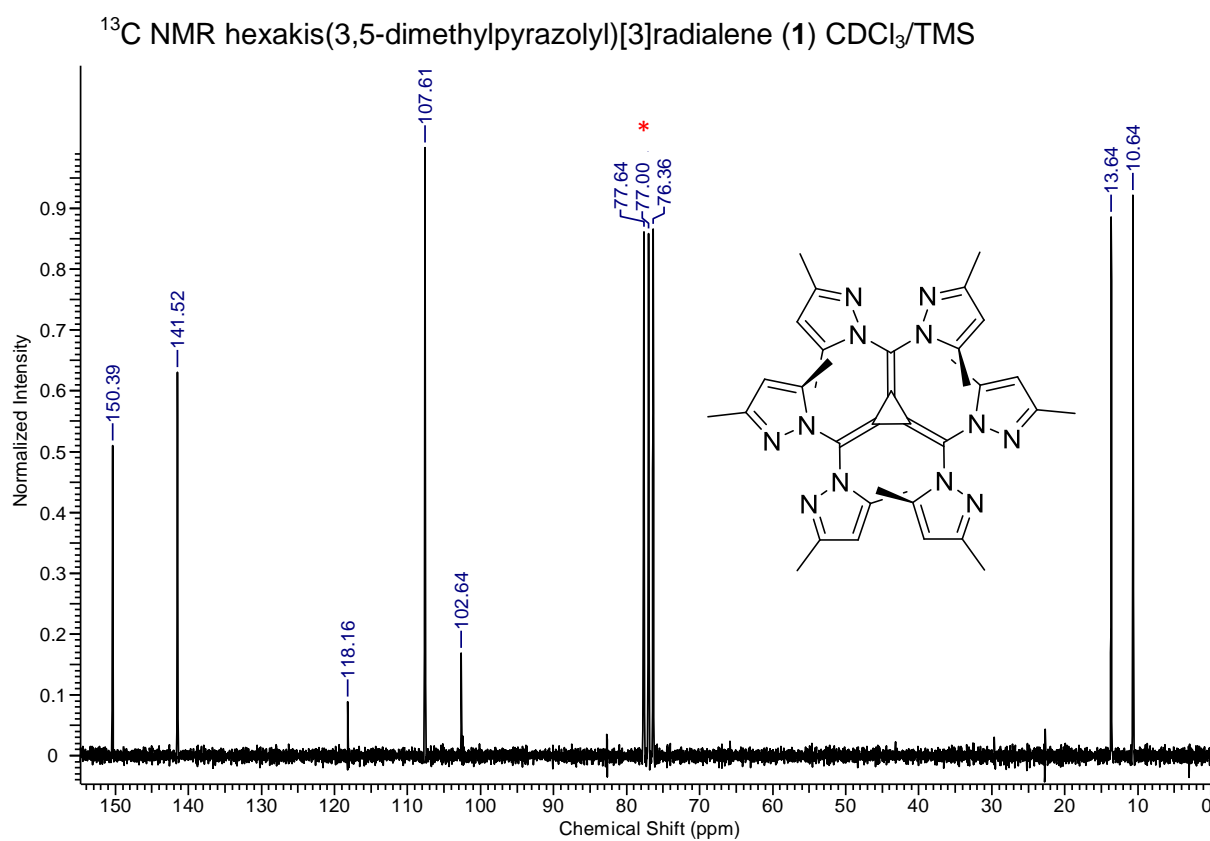

<sup>1</sup>H NMR 3,3'-diiododiphenylmethane (5) CDCl<sub>3</sub>/TMS

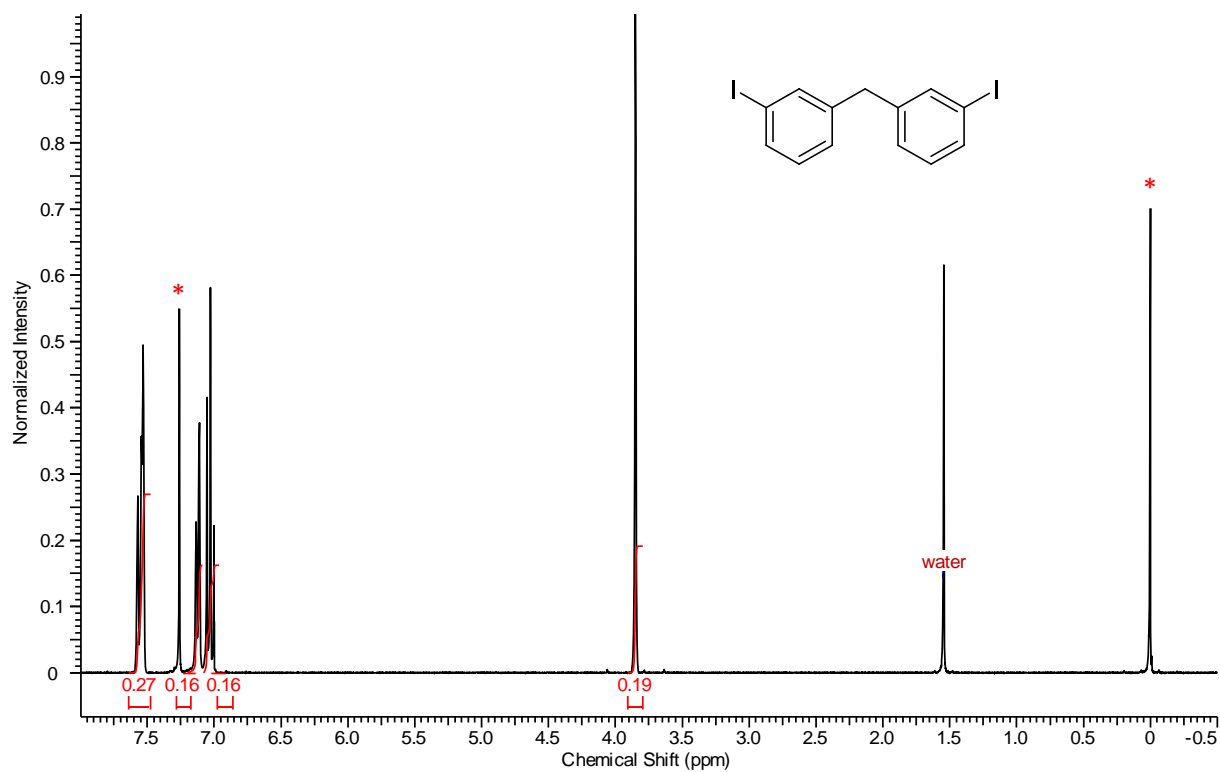

<sup>13</sup>C NMR 3,3'-diiododiphenylmethane (5) CDCl<sub>3</sub>/TMS

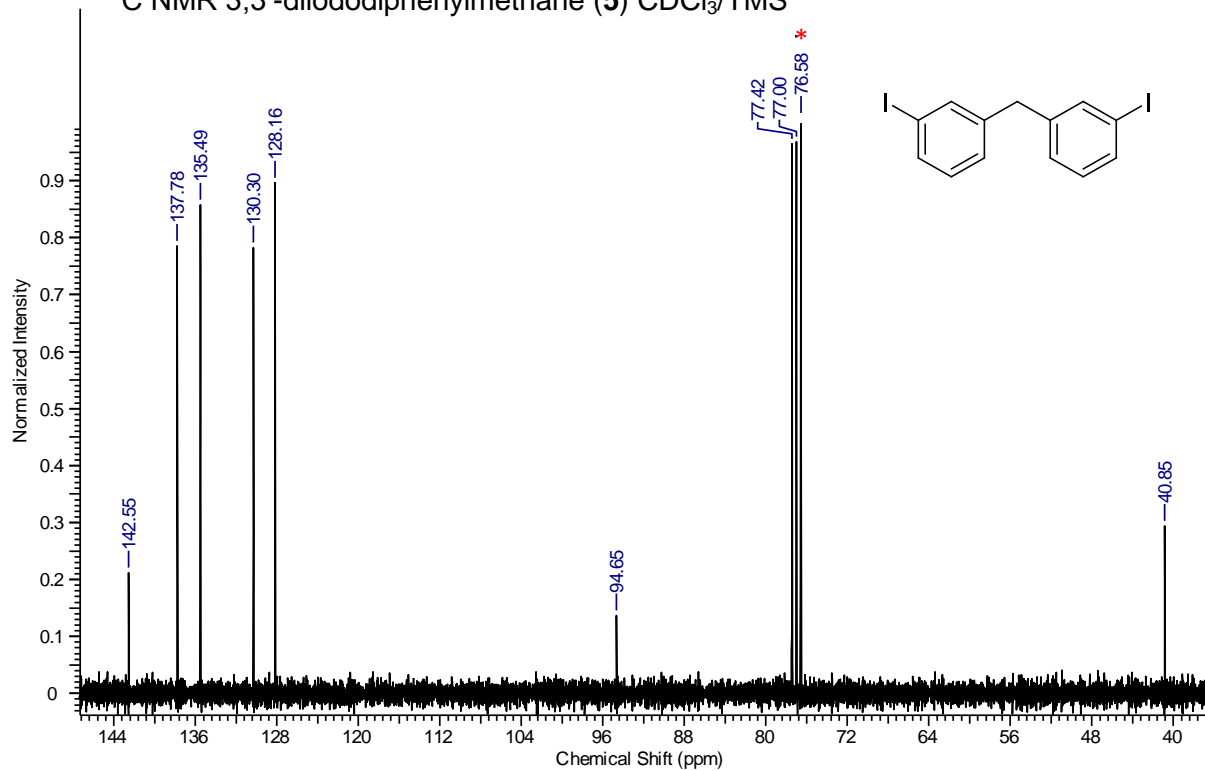

<sup>1</sup>H NMR 3,3'-dicyanodiphenylmethane (6) CDCl<sub>3</sub>/TMS

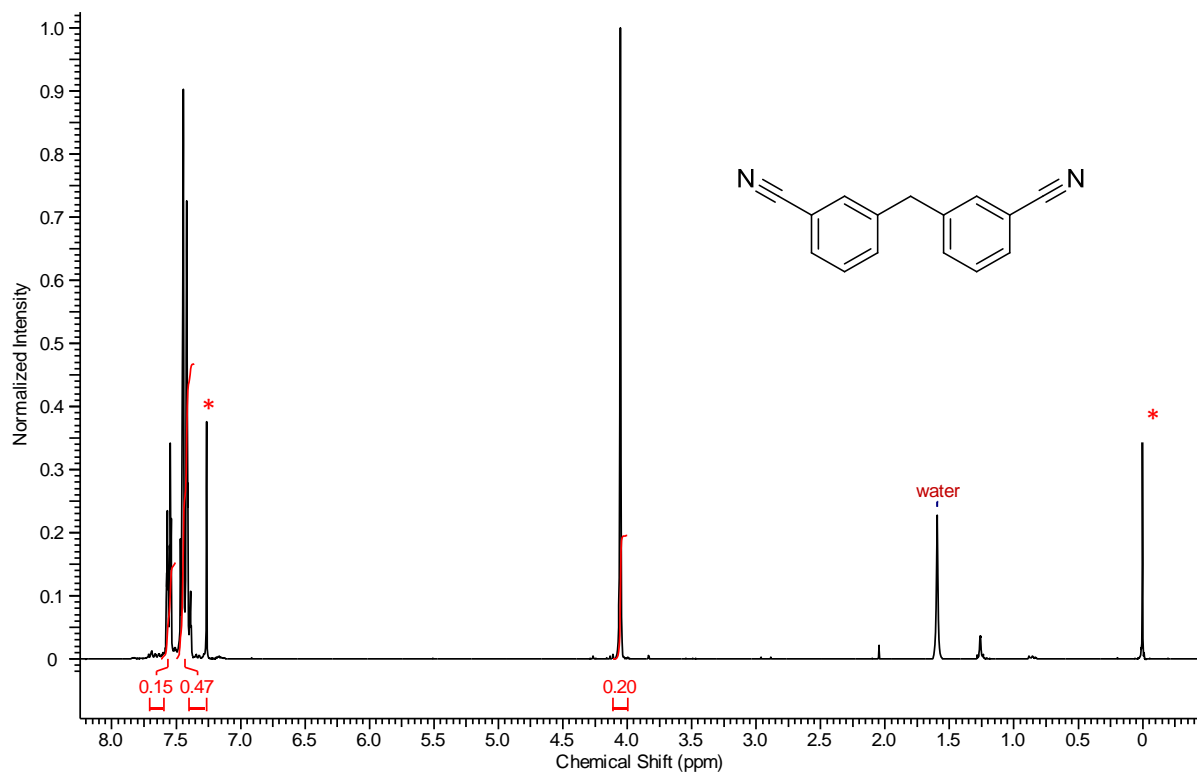

<sup>13</sup>C NMR 3,3'-dicyanodiphenylmethane (6) CDCl<sub>3</sub>/TMS

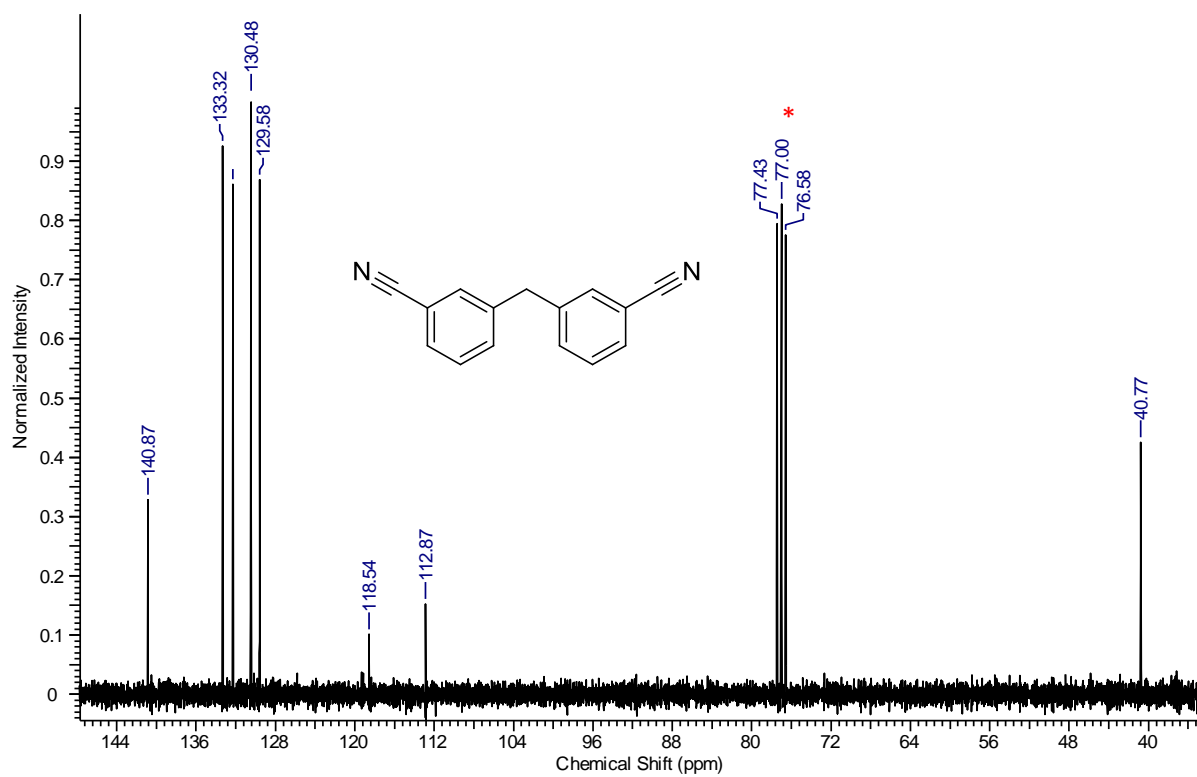



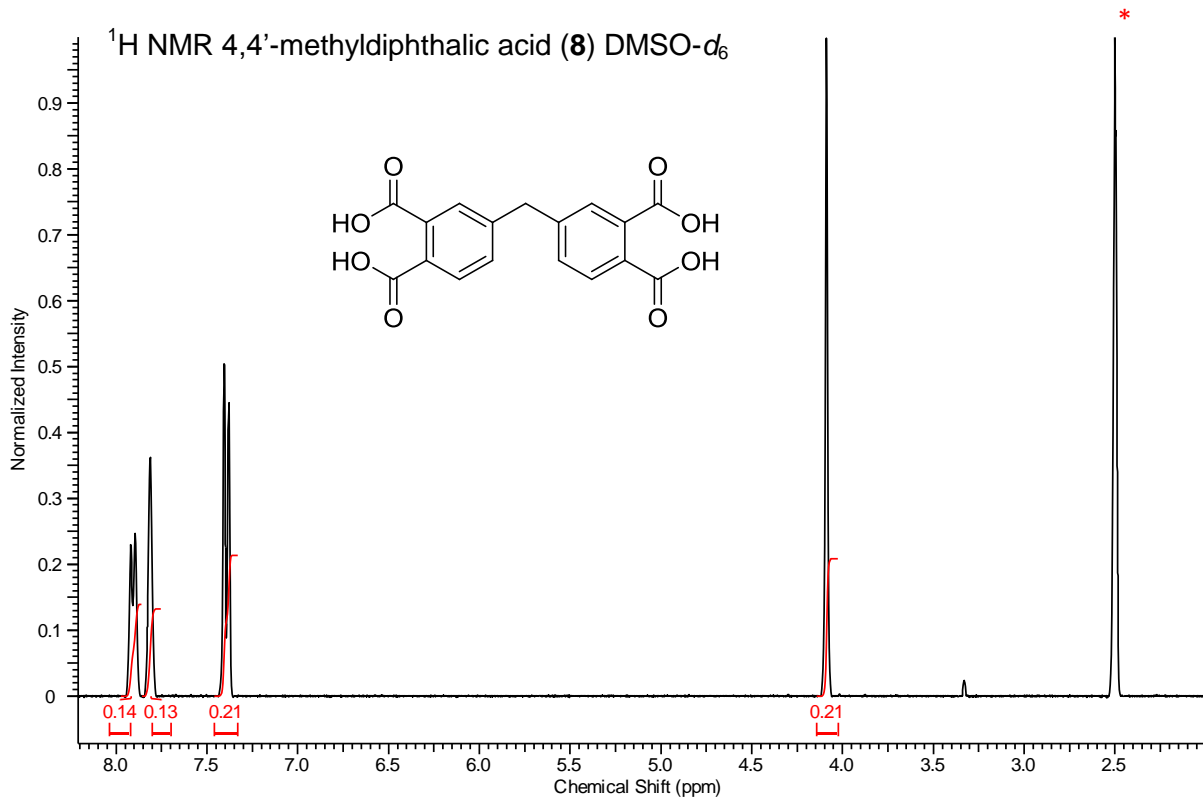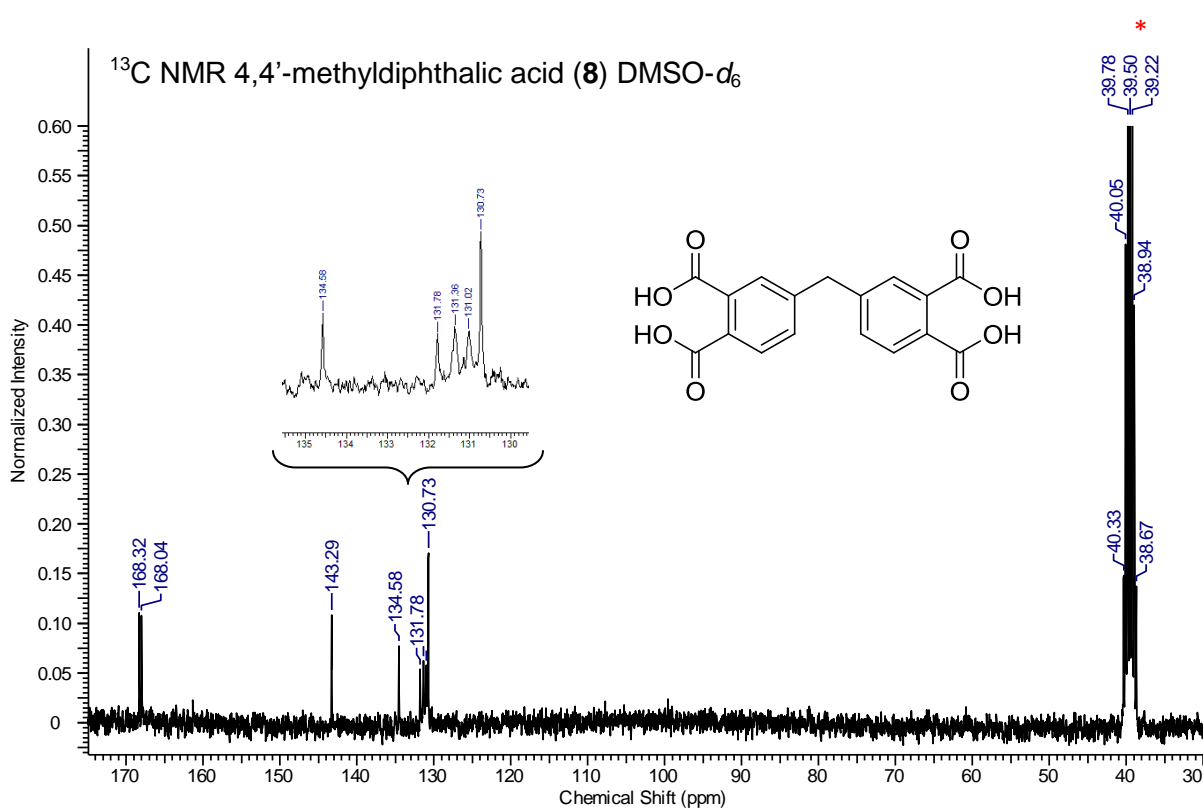

<sup>1</sup>H NMR 4,4'-methyldipthalimide (**9**) DMSO-d<sub>6</sub>

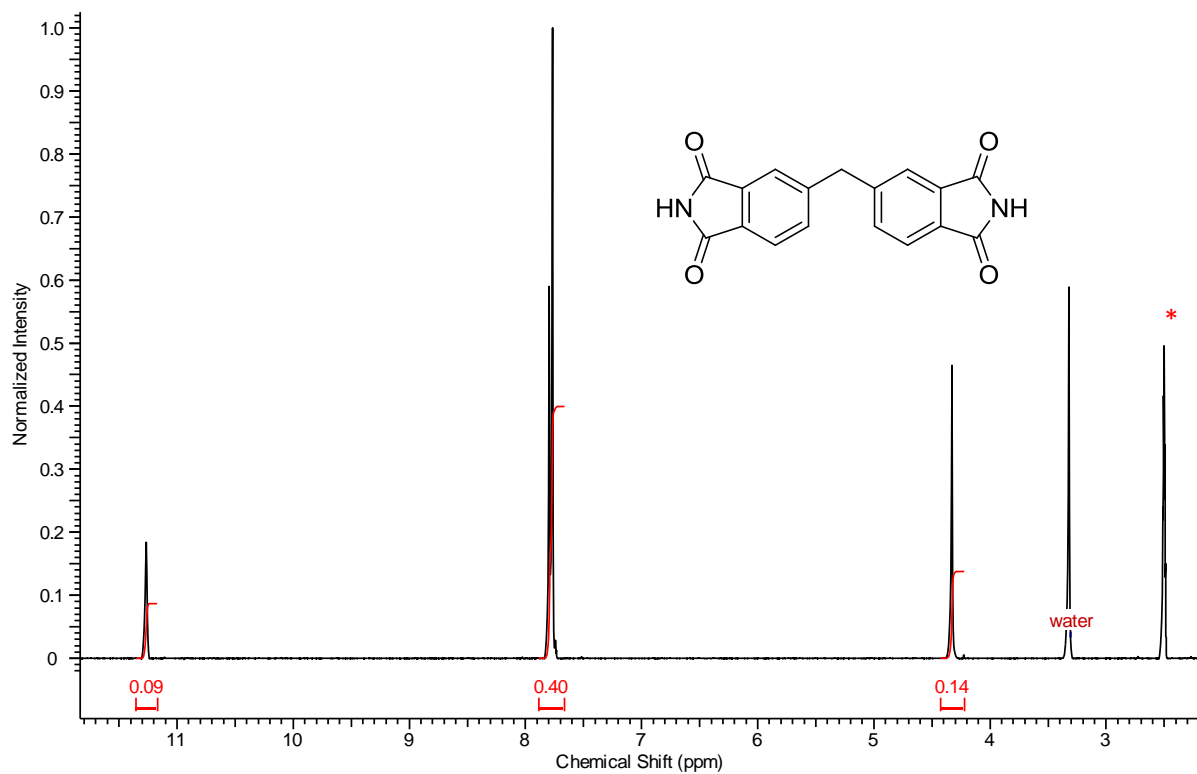

<sup>13</sup>C NMR 4,4'-methyldipthalimide (**9**) DMSO-d<sub>6</sub>

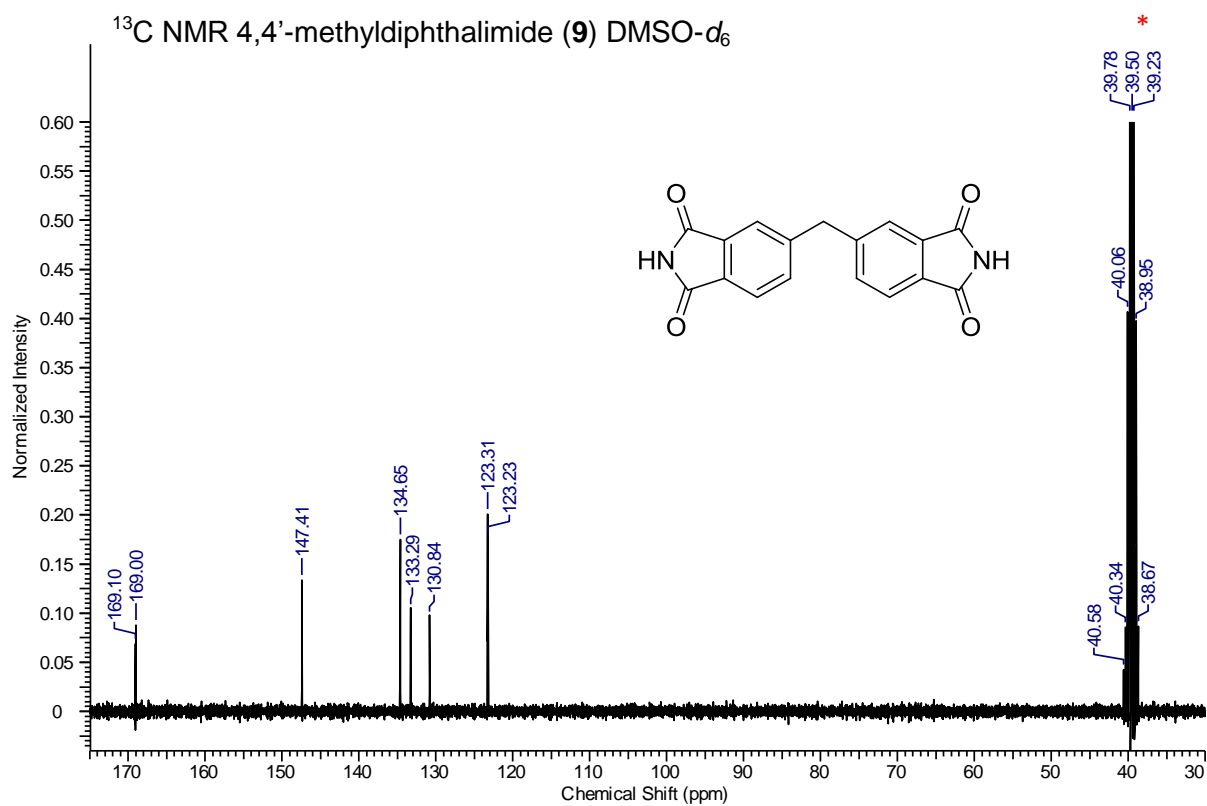

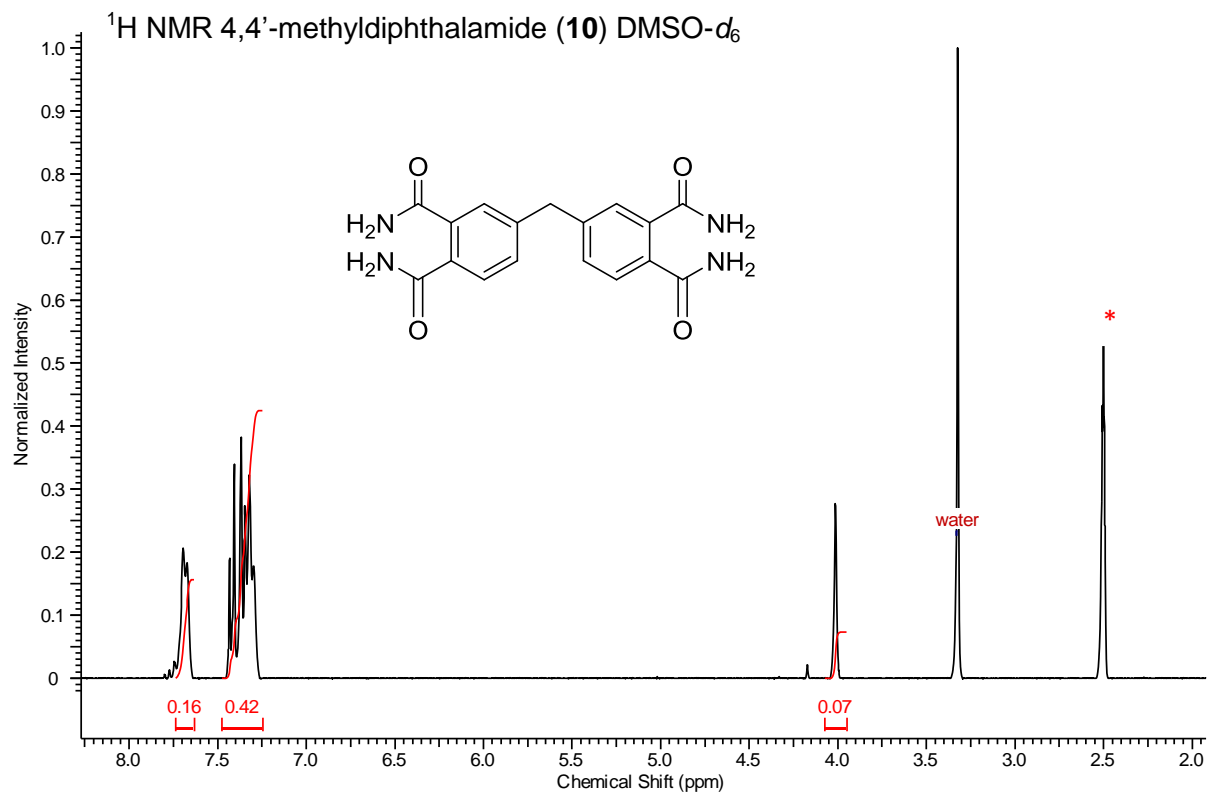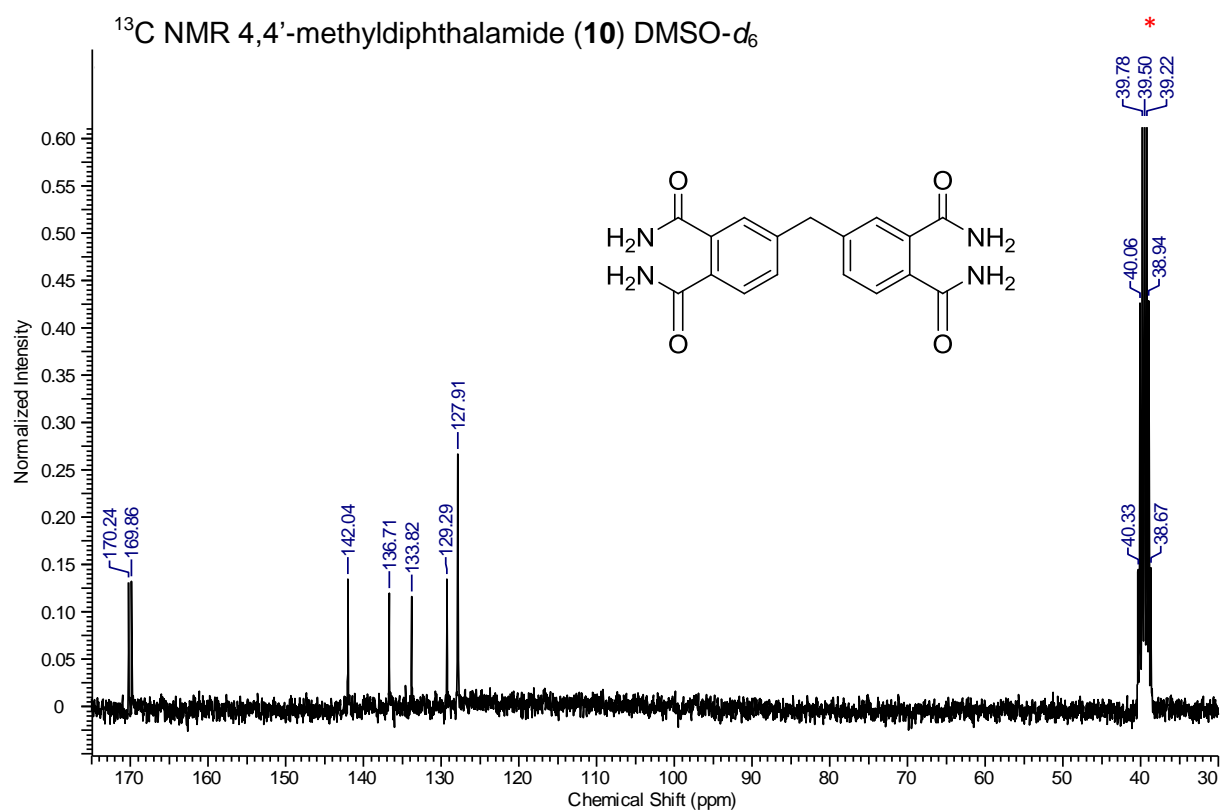



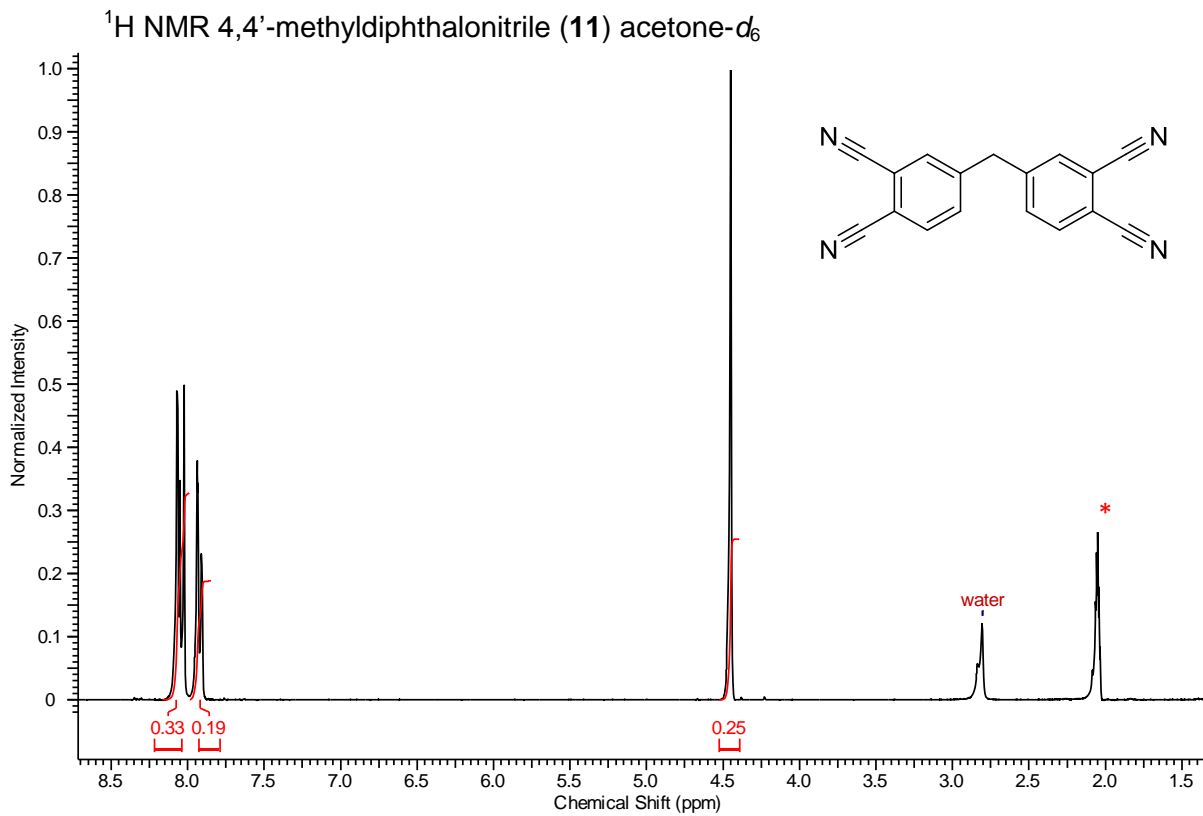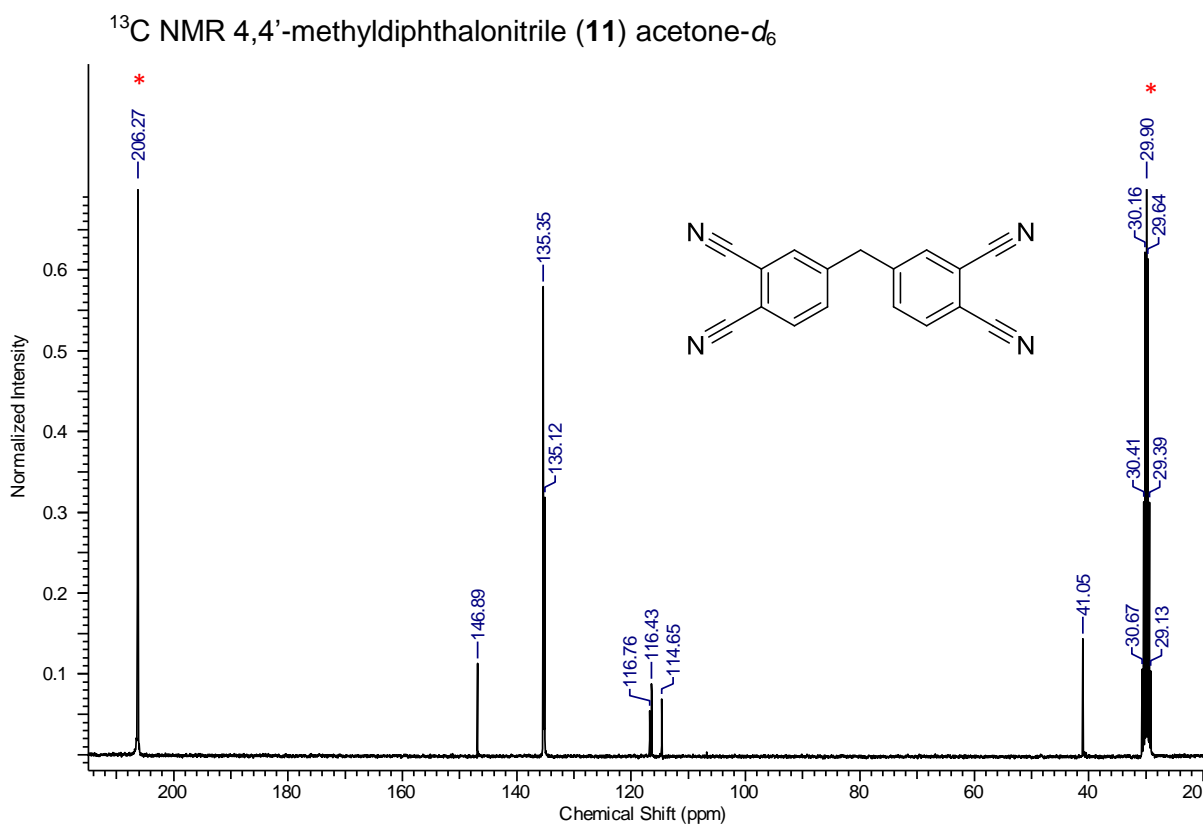

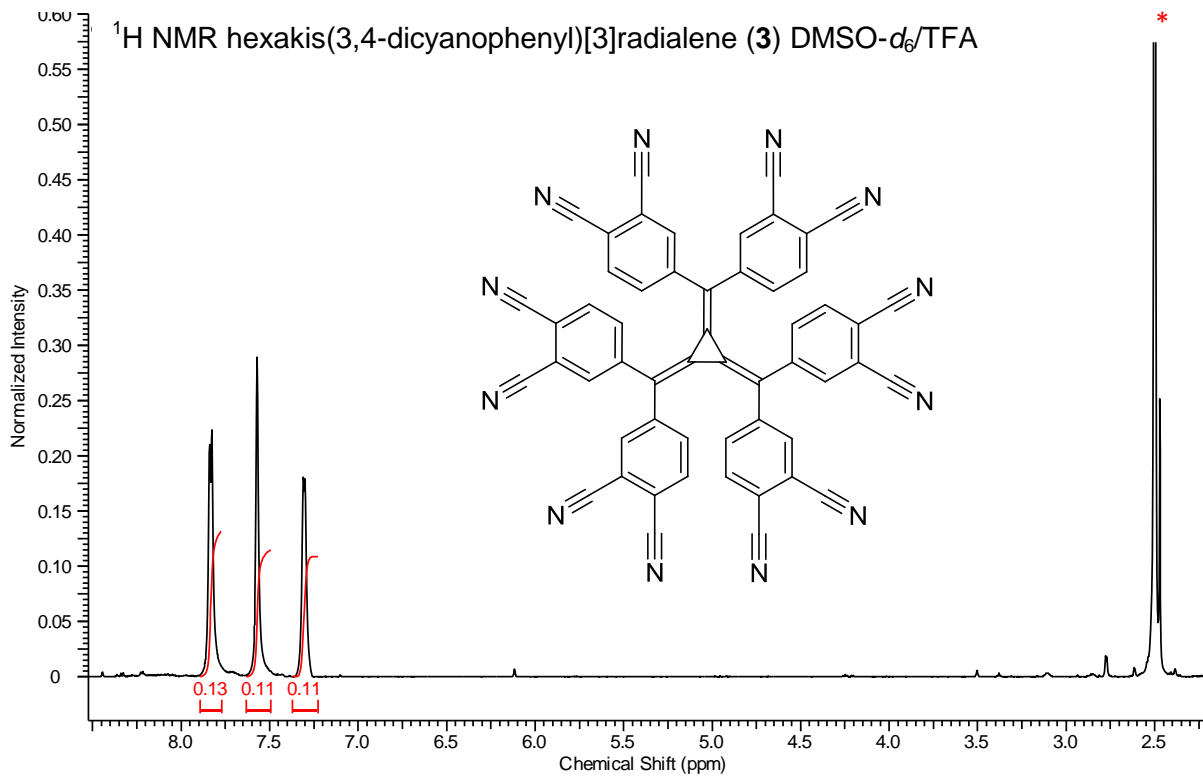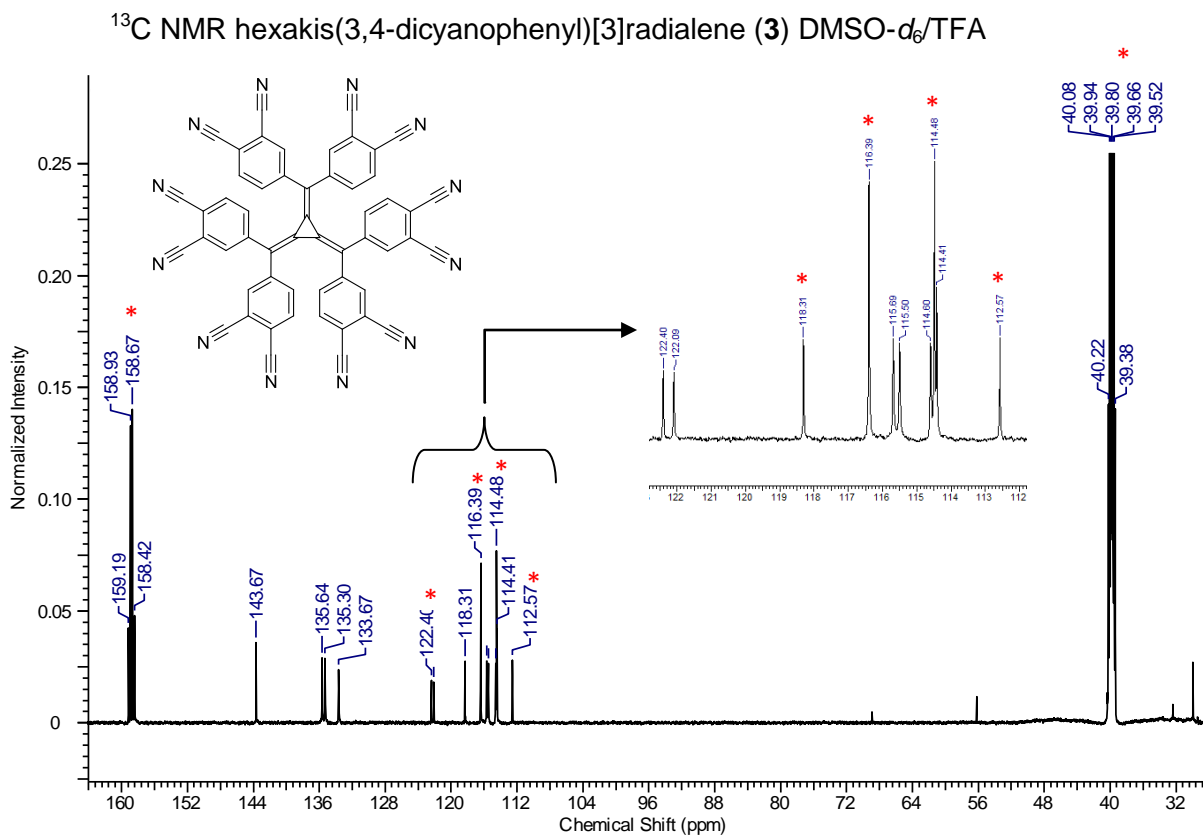

## Cyclic voltammograms of hexaaryl[3]radialenes

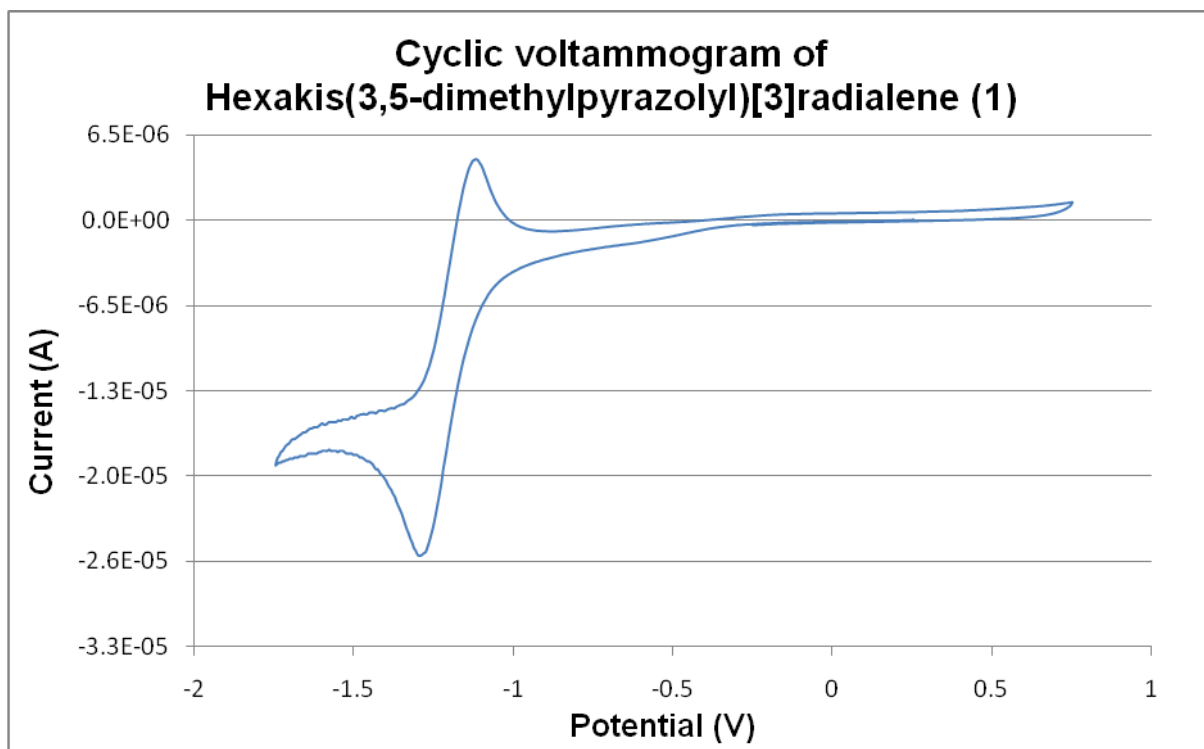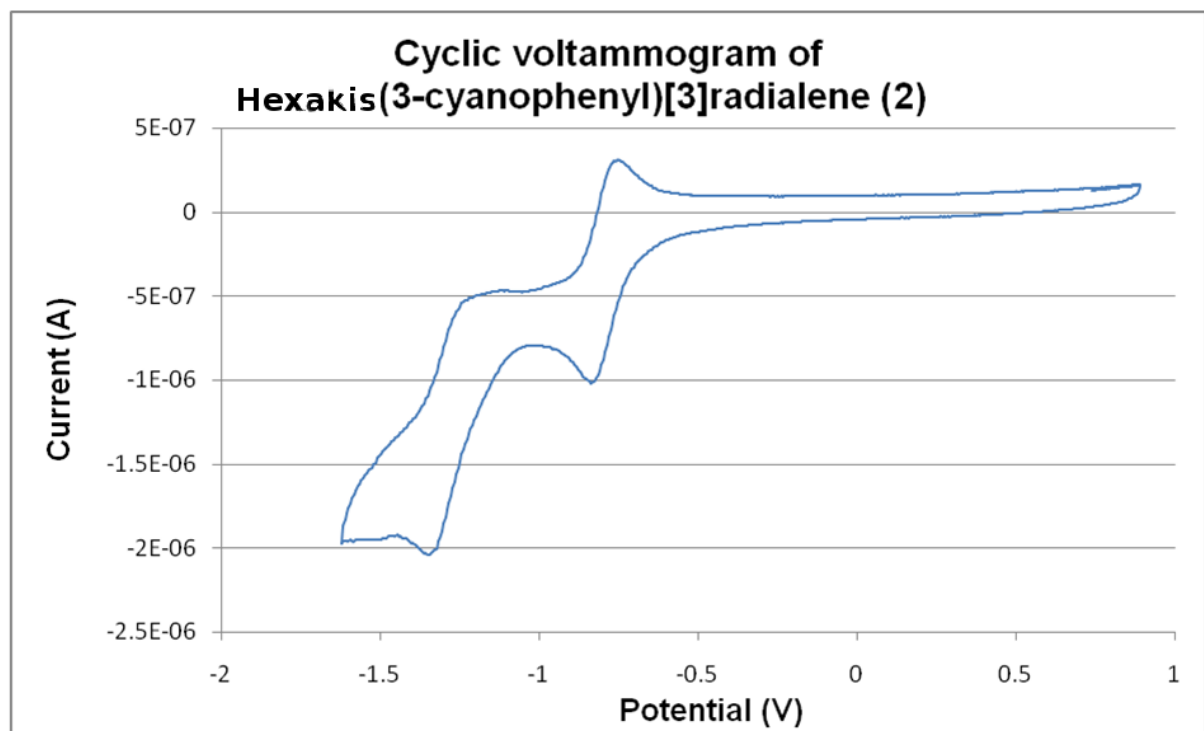

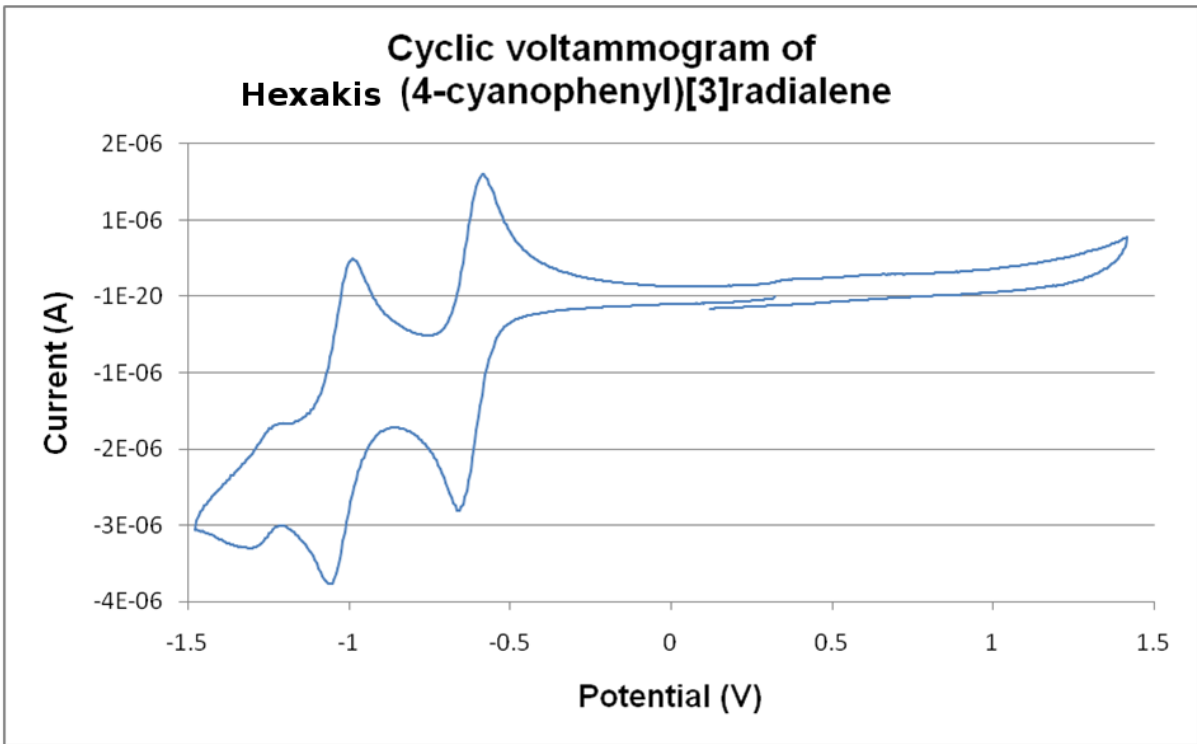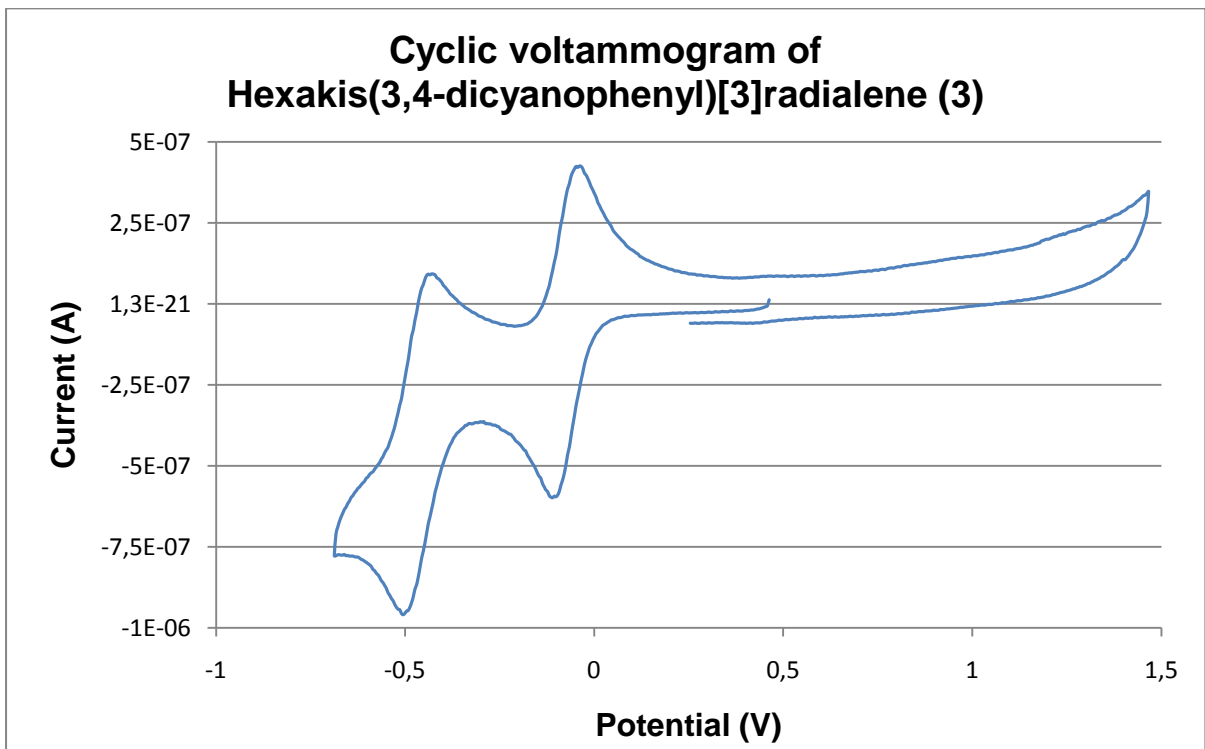

**Table 1: Crystal data and structure refinement for 3.**

|                                      |                                                                                                                                  |
|--------------------------------------|----------------------------------------------------------------------------------------------------------------------------------|
| Empirical formula                    | $C_{56}H_{21}N_{13}$                                                                                                             |
| Formula weight                       | 875.86                                                                                                                           |
| Temperature                          | 150(2) K                                                                                                                         |
| Wavelength                           | 0.7107 Å                                                                                                                         |
| Crystal system                       | Monoclinic                                                                                                                       |
| Space group                          | $P2_1/c$                                                                                                                         |
| Unit cell dimensions                 | $a = 13.7345(13)$ Å $\alpha = 90^\circ$<br>$b = 12.6611(9)$ Å $\beta = 93.942(8)^\circ$<br>$c = 25.128(2)$ Å $\gamma = 90^\circ$ |
| Volume                               | 4359.3(6) Å <sup>3</sup>                                                                                                         |
| Z                                    | 4                                                                                                                                |
| Density (calculated)                 | 1.335 Mg/m <sup>3</sup>                                                                                                          |
| Absorption coefficient               | 0.084 mm <sup>-1</sup>                                                                                                           |
| F(000)                               | 1792                                                                                                                             |
| Crystal size                         | 0.150 × 0.128 × 0.040 mm <sup>3</sup>                                                                                            |
| Theta range for data collection      | 2.67 to 23.26°                                                                                                                   |
| Index ranges                         | -15 ≤ h ≤ 15, -14 ≤ k ≤ 14, -27 ≤ l ≤ 27                                                                                         |
| Reflections collected                | 28680                                                                                                                            |
| Independent reflections              | 6241 [ $R_{int} = 0.1149$ ]                                                                                                      |
| Completeness to theta = 23.26°       | 99.9%                                                                                                                            |
| Absorption correction                | Semi-empirical from equivalents                                                                                                  |
| Max. and min. transmission           | 1.00000 and 0.84680                                                                                                              |
| Refinement method                    | Full-matrix least-squares on F <sup>2</sup>                                                                                      |
| Data / restraints / parameters       | 6241/0/623                                                                                                                       |
| Goodness-of-fit on F <sup>2</sup>    | 1.025                                                                                                                            |
| Final R indices [ $I > 2\sigma(I)$ ] | $R_1 = 0.0682$ , $wR_2 = 0.1296$                                                                                                 |
| R indices (all data)                 | $R_1 = 0.1324$ , $wR_2 = 0.1608$                                                                                                 |
| Largest diff. peak and hole          | 0.362 and -0.320 e.Å <sup>-3</sup>                                                                                               |
